# Supplementary material for: REGN MODEL FIXR. Regeneration Model for Fixed-Bed
Source: MDPI journal article supplement (doi:10.3390/cancers14174320), 1991-12-04

**Supplementary Table S1. Baseline Demographic and Tumor Characteristics for complete ICC patient cohort.**  
NAT: neoadjuvant therapy; AT: adjuvant therapy.

| Characteristic                                                                                               | N (%)            |
|--------------------------------------------------------------------------------------------------------------|------------------|
| Age, years, mean (SD)                                                                                        | 64.5 (10.9)      |
| Age, years, range                                                                                            |                  |
| 18-55                                                                                                        | 484 (17.7)       |
| 56-69                                                                                                        | 1293 (47.3)      |
| 70+                                                                                                          | 959 (35.1)       |
| Median follow up, months (IQR)                                                                               | 30.8 (16.6–53.0) |
| Gender                                                                                                       |                  |
| Male                                                                                                         | 1214 (44.4)      |
| Female                                                                                                       | 1522 (55.6)      |
| Race                                                                                                         |                  |
| White                                                                                                        | 2145 (78.4)      |
| Black                                                                                                        | 172 (6.3)        |
| Hispanic                                                                                                     | 143 (5.2)        |
| Asian Pacific Islander                                                                                       | 148 (5.4)        |
| Other/Missing                                                                                                | 128 (4.7)        |
| Insurance Status, n (%)                                                                                      |                  |
| Uninsured                                                                                                    | 45 (1.6)         |
| Private                                                                                                      | 1080 (39.5)      |
| Public/Government                                                                                            | 1540 (56.3)      |
| Missing                                                                                                      | 71 (2.6)         |
| Charlson comorbidity score                                                                                   |                  |
| 0-1                                                                                                          | 2431 (88.9)      |
| ≥2                                                                                                           | 305 (11.1)       |
| Facility Type                                                                                                |                  |
| Community Cancer Program, Comprehensive<br>Community Cancer Program, or Integrated Network<br>Cancer Program | 941 (34.4)       |
| Academic / Research Program                                                                                  | 1731 (63.3)      |
| Other/Unknown                                                                                                | 64 (2.3)         |
| Tumor size, cm                                                                                               |                  |
| <2                                                                                                           | 170 (6.2)        |
| 2-5                                                                                                          | 1101 (40.2)      |
| >5                                                                                                           | 1283 (46.9)      |
| Missing                                                                                                      | 182 (6.7)        |
| Tumor grade                                                                                                  |                  |
| Well-differentiated                                                                                          | 311 (11.4)       |
| Moderately differentiated                                                                                    | 1349 (49.3)      |
| Poorly or undifferentiated                                                                                   | 704 (25.7)       |
| Missing                                                                                                      | 372 (13.6)       |
| TNM Clinical T                                                                                               |                  |
| T1                                                                                                           | 1089 (39.8)      |

|                                        |             |
|----------------------------------------|-------------|
| T2                                     | 511 (18.7)  |
| T3                                     | 183 (6.7)   |
| T4                                     | 21 (0.8)    |
| Tx                                     | 932 (34.1)  |
| TNM Clinical N                         |             |
| N0                                     | 2098 (76.7) |
| N1                                     | 59 (2.2)    |
| Nx                                     | 579 (21.2)  |
| Surgery type                           |             |
| Wedge, segmentectomy, or sectionectomy | 1353 (49.5) |
| Hemi-hepatectomy                       | 935 (34.2)  |
| Extended hepatectomy                   | 383 (14)    |
| Surgery NOS                            | 65 (2.4)    |
| Resection Margin                       |             |
| Negative                               | 2082 (76.1) |
| Positive                               | 491 (17.9)  |
| Missing                                | 163 (6.0)   |
| Regional nodes positive                |             |
| 0                                      | 1209 (44.2) |
| ≥1                                     | 147 (5.4)   |
| No LN examined                         | 1350 (49.3) |
| Unknown                                | 30 (1.1)    |
| Number of lymph nodes examined         |             |
| 0                                      | 1350 (49.3) |
| 1-5                                    | 1033 (37.8) |
| ≥6                                     | 295 (10.8)  |
| Unknown                                | 58 (2.1)    |
| Treatment strategy                     |             |
| NAT*                                   | 182 (6.7)   |
| Surgery alone                          | 1749 (63.9) |
| AT†                                    | 805 (29.4)  |
| Chemotherapy regimen                   |             |
| None                                   | 1749 (63.9) |
| Single-agent                           | 438 (16)    |
| Multi-agent                            | 479 (17.5)  |
| Missing                                | 70 (2.6)    |
| Radiation                              |             |
| No                                     | 2328 (85.1) |
| Yes                                    | 408 (14.9)  |

**Supplementary Figure S1.** Comparison of overall survival by treatment strategy using multivariable Cox proportional-hazards regression analyses for patients with resectable intrahepatic cholangiocarcinoma.

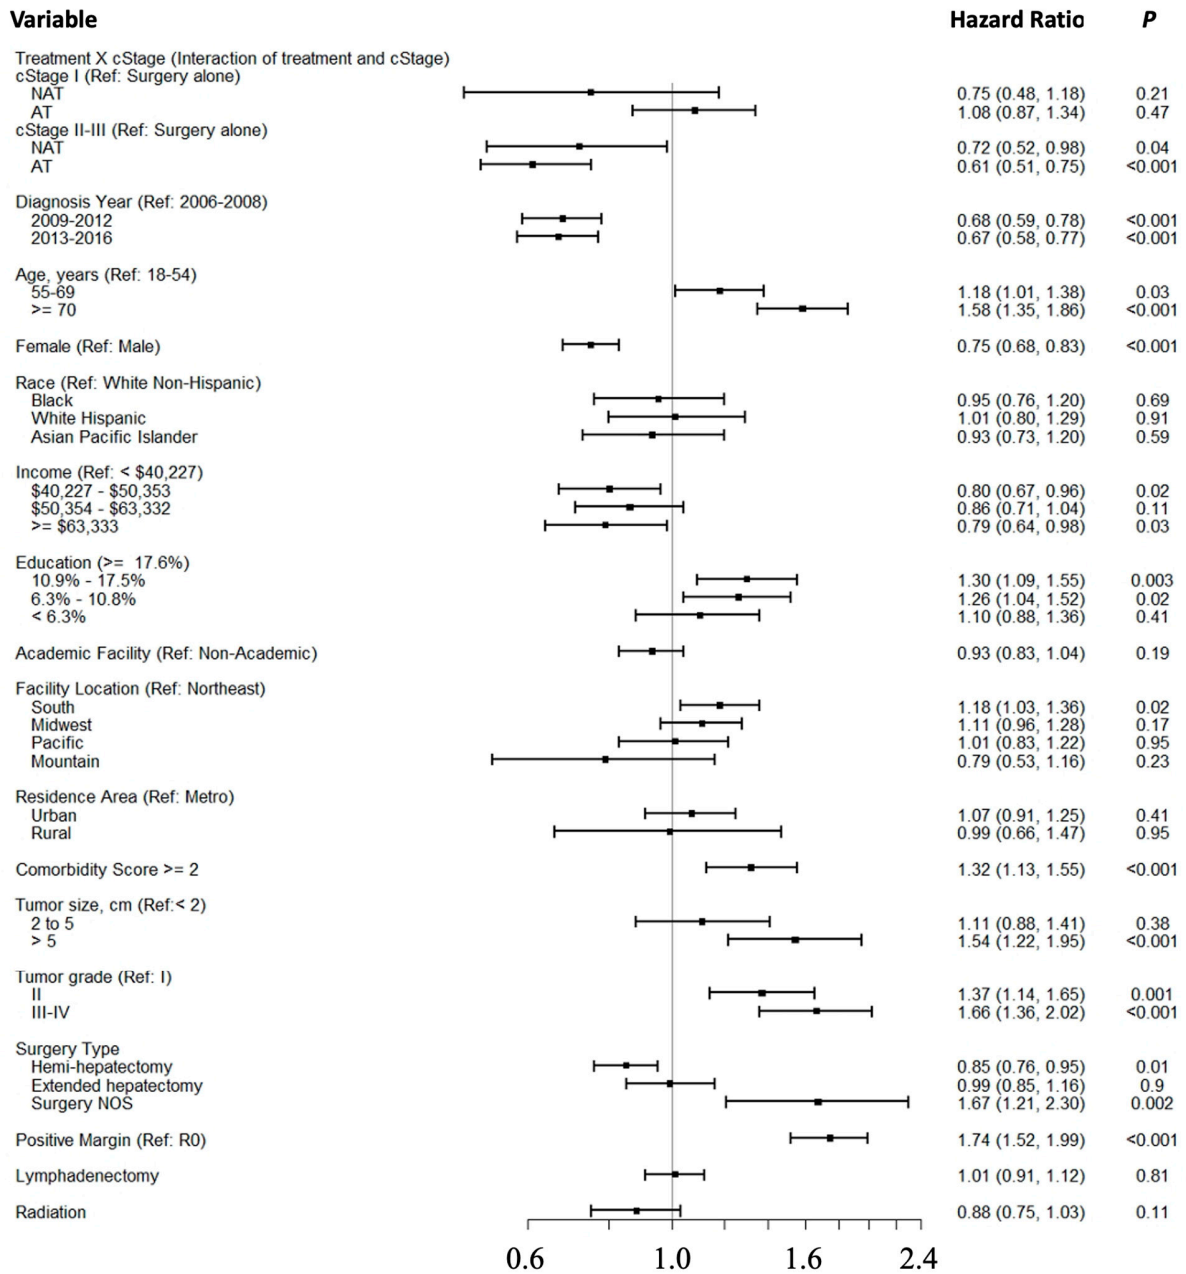

**Supplementary Figure S2.** Comparison of overall survival by treatment strategy adjusted using Cox regression with IPTW and three-month landmark analyses for patients with (a) clinical stage I and (b) stages II-III resectable intrahepatic cholangiocarcinoma. IPTW: inverse probability of treatment weighting.

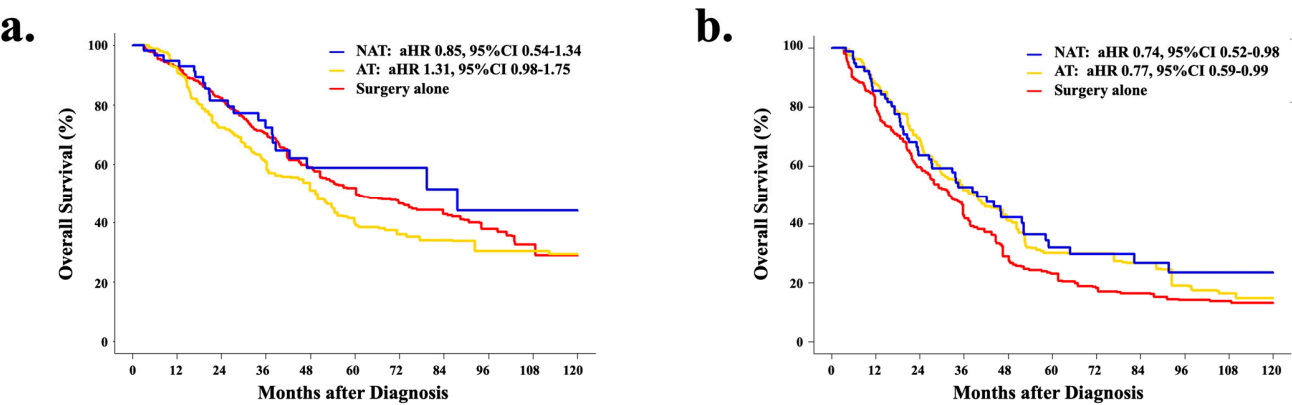

Supplement: s1 [file s1]
